# Supplementary material for: Core–shell coaxially structured triboelectric nanogenerator for energy harvesting and motion sensing
Source: Royal Society of Chemistry journal article supplement (doi:10.1039/c7ra12739a), 2018-01-01
Supplement: c7ra12739a1.pdf [file c7ra12739a1.pdf]

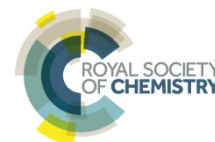

Journal Name

ARTICLE

Supplementary Information

# Core-Shell Coaxially Structured Triboelectric Nanogenerator for Energy Harvesting and Motion Sensing

Zhumei Tian<sup>a,b</sup>, Jian He<sup>a</sup>, Xi Chen<sup>a</sup>, Tao Wen<sup>a</sup>, Cong Zhai<sup>a</sup>, Zengxing Zhang<sup>c</sup>,

Jundong Cho<sup>a,d</sup>, Xiujian Chou<sup>a</sup>, Chenyang Xue<sup>a,\*</sup>

<sup>a</sup> Science and Technology on Electronic Test and Measurement Laboratory, North University of China,  
Taiyuan, 030051, China.

<sup>b</sup> Department of electronics, Xinzhou teachers university, Xinzhou, 034000, China.

<sup>c</sup> Department of Micro and Nano Systems Technology, University College of Southeast Norway, Horten,  
3184, Borre, Norway.

<sup>d</sup> Department of Electrical and Electronic Engineering, Sungkyunkwan University, Suwon, 16419, South  
Korea

\*Corresponding author,

Prof. Chenyang Xue,

Address: NO. 3, College Road, Taiyuan City, Shanxi Province, China

Email: [xuechenyang@nuc.edu.cn](mailto:xuechenyang@nuc.edu.cn)

## Supporting Videos

- 1、 Supporting video of lighting up 60 commercial LEDs when walking (fixed under the foot).
- 2、 Supporting video of driving a competition timer when walking (fixed under the foot).
- 3、 Supporting video of the motion sensing when elbow is bend in different angles.
